# Supplementary material for: Improving the neonatal team handoff process in a level IV NICU: reducing interruptions and handoff duration
Source: PubMed Central journal article supplement — BMJ Open Qual. 2021 Jan 20;10(1):e001014. doi: 10.1136/bmjoq-2020-001014 (PMC7818842; doi:10.1136/bmjoq-2020-001014), 2021-01-20
Supplement: bmjoq-2020-001014supp001.pdf [file bmjoq-2020-001014supp001.pdf]

## Appendix 1. Sample Avoidable and Unavoidable Interruptions

| <i>Avoidable Interruptions</i>                                                                     | <i>Unavoidable Interruptions</i>                           |
|----------------------------------------------------------------------------------------------------|------------------------------------------------------------|
| Request for non-urgent orders                                                                      | STAT orders                                                |
| Request for PRN orders                                                                             | Change in patient status requiring face-to-face evaluation |
| Calls for non-urgent family updates                                                                | Transport Calls Admissions                                 |
| Non-urgent updates from other NICU providers (attending, fellows, NNPs, PAs, residents) or nursing | Admissions                                                 |
| Questions on “who’s on call team”                                                                  | Consultant recommendations                                 |
|                                                                                                    | Critical imaging or laboratory results                     |
|                                                                                                    | Post-operative provider handoff                            |
