# Supplementary material for: Improving the neonatal team handoff process in a level IV NICU: reducing interruptions and handoff duration
Source: PubMed Central journal article supplement — BMJ Open Qual. 2021 Jan 20;10(1):e001014. doi: 10.1136/bmjoq-2020-001014 (PMC7818842; doi:10.1136/bmjoq-2020-001014), 2021-01-20
Supplement: bmjoq-2020-001014supp002.pdf [file bmjoq-2020-001014supp002.pdf]

**Appendix 2. Sample NICU I-PASS Electronic Handoff Document**

| <b>STABLE/WATCHER/UNSTABLE</b>                                                                                                                                      |      | <i>Reason for admission/brief HPI</i>                                                                                                                                                                                                                                                                                                                                                                            |  |  | <b>Daytime Action Plan:</b> | <b>On Call Action Plan:</b> | <b>Situational Awareness &amp; Contingency Plan:</b> | <b>Dosing weight:</b> |  |  |        |  |  |  |  |  |                                                                                                                                             |
|---------------------------------------------------------------------------------------------------------------------------------------------------------------------|------|------------------------------------------------------------------------------------------------------------------------------------------------------------------------------------------------------------------------------------------------------------------------------------------------------------------------------------------------------------------------------------------------------------------|--|--|-----------------------------|-----------------------------|------------------------------------------------------|-----------------------|--|--|--------|--|--|--|--|--|---------------------------------------------------------------------------------------------------------------------------------------------|
| <b>Name:</b><br><b>DOB:</b><br><b>DOA:</b><br><b>Hospital:</b><br><b>GA:</b><br><b>BW:</b><br><b>MRN:</b><br><b>DOL:</b><br><b>AGA:</b><br><b>Active Diagnoses:</b> |      | <b>Resp:</b><br><br><b>CV:</b><br><br><b>FEN/GI:</b><br><br><b>ID:</b><br><br><b>Heme:</b><br><br><b>Neuro:</b><br><br><b>Ophtho:</b><br><br><b>Metabolic/Endocrine:</b><br><table border="1"> <tr> <th>NBS</th> <th>Date</th> <th>Result</th> </tr> <tr> <td>Initial</td> <td></td> <td></td> </tr> <tr> <td>28 day</td> <td></td> <td></td> </tr> </table> <b>Healthcare Maintenance:</b><br><br><b>Other:</b> |  |  | NBS                         | Date                        | Result                                               | Initial               |  |  | 28 day |  |  |  |  |  | <b>Access:</b><br><br><b>Medications</b><br><br><b>Consults:</b><br><br><b>Weekly Lab Schedule:</b><br><br><b>Emergency Family Contact:</b> |
| NBS                                                                                                                                                                 | Date | Result                                                                                                                                                                                                                                                                                                                                                                                                           |  |  |                             |                             |                                                      |                       |  |  |        |  |  |  |  |  |                                                                                                                                             |
| Initial                                                                                                                                                             |      |                                                                                                                                                                                                                                                                                                                                                                                                                  |  |  |                             |                             |                                                      |                       |  |  |        |  |  |  |  |  |                                                                                                                                             |
| 28 day                                                                                                                                                              |      |                                                                                                                                                                                                                                                                                                                                                                                                                  |  |  |                             |                             |                                                      |                       |  |  |        |  |  |  |  |  |                                                                                                                                             |
| <b>Resolved Diagnoses:</b><br><br><br><b>CODE STATUS:</b>                                                                                                           |      |                                                                                                                                                                                                                                                                                                                                                                                                                  |  |  |                             |                             |                                                      |                       |  |  |        |  |  |  |  |  |                                                                                                                                             |
